# Supplementary material for: UV-B–induced forest sterility: Implications of ozone shield failure in Earth’s largest extinction
Source: PubMed Central journal article supplement (PMC5810612; doi:10.1126/sciadv.1700618), 2018-02-07
Supplement: 1700618_SM.pdf [file 1700618_SM.pdf]

## Supplementary Materials for **UV-B–induced forest sterility: Implications of ozone shield failure in Earth’s largest extinction**

Jeffrey P. Benca, Ivo A. P. Duijnste, Cindy V. Looy

Published 7 February 2018, *Sci. Adv.* **4**, e1700618 (2018)

DOI: 10.1126/sciadv.1700618

### **This PDF file includes:**

- Supplementary Text
- fig. S1. BE UV-B fluxes versus distance from UV-B lamps in growth chamber experiments.
- fig. S2. Pollen cone subsampling strategy.
- fig. S3. Sample size and accuracy of malformed pollen frequency determination.
- table S1. Results of a two–mixed-factor nested ANOVA of malformed pollen frequencies.
- table S2. Summary of a pairwise, two–mixed-factor nested ANOVA of malformed pollen frequencies.
- table S3. Pollen malformation frequencies, percentages, and index per tree.
- table S4. Ovulate cone survivorship across treatments.
- table S5. Temperature settings during growth chamber experiment.
- table S6. Photoperiod settings during growth chamber experiment.
- References (78–80)

## Supplementary Text

### Fig. 1.

(A–H) Accession notation: *Sample-slide; England finder coordinate*. (A) 6403373-8; H35. (B) 6403369-8; W40. (C) 6403361. (D) 6403373-8; L34. (E) 6403400-2; T18/3. (F) 6403400-12; N24/3. (G) 6403381-11; Y24/2. (H) 4748/36; N33. Specimens with accession number starting with 640– are housed at Geoscience Australia while 4748– are housed at the Palaeontological Institute, Moscow. Fossilized pollen images courtesy of S. Afonin. Grains published: (A, E–G) Fig. 4 in (5). (H) (78). (I–P) Notation: *Specimen-slide; England finder coordinate, treatment*. (I) 200778-200505; T45-3, 93 (kJ m<sup>-2</sup>d<sup>-1</sup>)<sub>BE</sub>. (J) 200779-200684; P47-3, 54 (kJ m<sup>-2</sup>d<sup>-1</sup>)<sub>BE</sub>. (K) 200780-200715; L47, 75 (kJ m<sup>-2</sup>d<sup>-1</sup>)<sub>BE</sub>. (L) 200781-200746; P45, 75 (kJ m<sup>-2</sup>d<sup>-1</sup>)<sub>BE</sub>. (M) 200782-200714; L45-2, 75 (kJ m<sup>-2</sup>d<sup>-1</sup>)<sub>BE</sub>. (N) 200783-200743; M40, 75 (kJ m<sup>-2</sup>d<sup>-1</sup>)<sub>BE</sub>. (O) 200784-200661; N42-4, 54 (kJ m<sup>-2</sup>d<sup>-1</sup>)<sub>BE</sub>. (P) 200785-200568; N44, 54 (kJ m<sup>-2</sup>d<sup>-1</sup>)<sub>BE</sub>. *P. mugo* pollen was collected from cones under accession 200281. Extended depth of field (EDF) images were generated using CombineZP (55) by J.P.B.

### Fig. 3.

Boxplots represent individual tree specimen pollen yields. Tree specimens in the following order–left to right. Notation: species-specimen number. Species: *Pinus mugo* (PM). (Control [0 (kJ m<sup>-2</sup>d<sup>-1</sup>)<sub>BE</sub>]): PM03, PM17, PM24. (54 (kJ m<sup>-2</sup>d<sup>-1</sup>)<sub>BE</sub>): PM15, PM36, PM44. (75 (kJ m<sup>-2</sup>d<sup>-1</sup>)<sub>BE</sub>): PM38, PM52, PM54. (93 (kJ m<sup>-2</sup>d<sup>-1</sup>)<sub>BE</sub>): PM10, PM28, PM44. Lower and upper limits of the boxes correspond with first and third quartiles (based on interpolation), the horizontal line in each box represents the median, and whiskers give

minimum and maximum values in the data. See results in table S1 and summary in table S2 for two-mixed-factor nested ANOVA.

**Fig. 4, A.**

Stages compiled based on controlled pollination studies of *Pinus* (62–64) amended with substages of 4 and 5 (60, 65). Digitally vectored illustrations rendered by J.P.B. using Adobe Illustrator® CS6 (San Jose, CA, US).

**Extended list of acknowledgements**

J.P.B. thanks T. Dawson, A. Doban and D. Apodaca for growth chamber support, as well as R. Kirchholtes, S. Kauppinen, W. Hsiung and C. Williams for assisting in plant maintenance during travels.

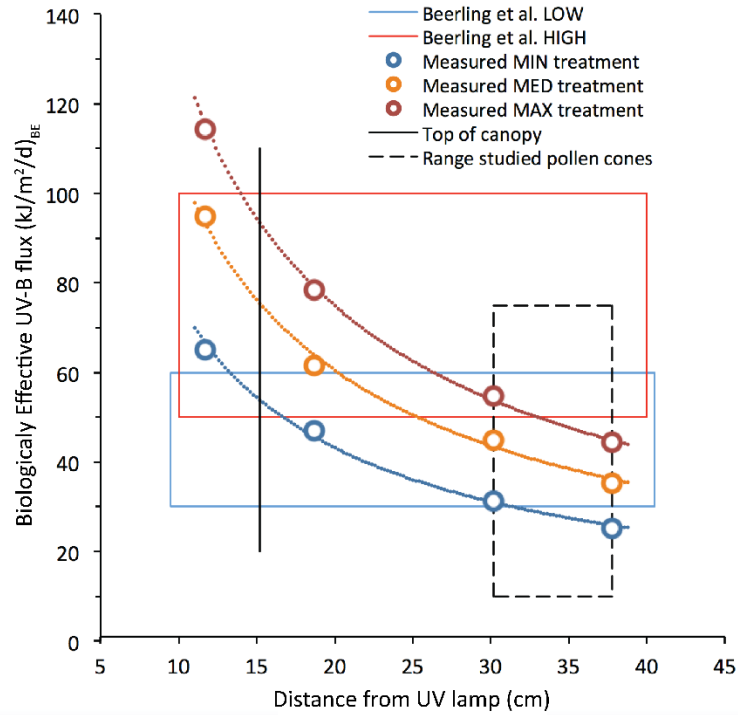

**fig. S1. BE UV-B fluxes versus distance from UV-B lamps in growth chamber**

**experiments.** MIN, MED and MAX refer to the three treatment levels of enhanced UV-B irradiation. Red and blue boxes indicate the range of fluxes in the highest and lowest irradiation scenarios modeled for the end-Permian (33). The vertical black line indicates the position at the average top of tree canopies while the black dashed box represents the distance range from the lamp from which pollen cones were analyzed. Open circles give the measured BE UV-B flux values, dotted curves represent the modeled relation between BE UV-B flux and distance ( $y = 485 x^{-0.807}$ ,  $y = 678 x^{-0.807}$  and  $y = 840 x^{-0.807}$  for MIN, MED and MAX, respectively).

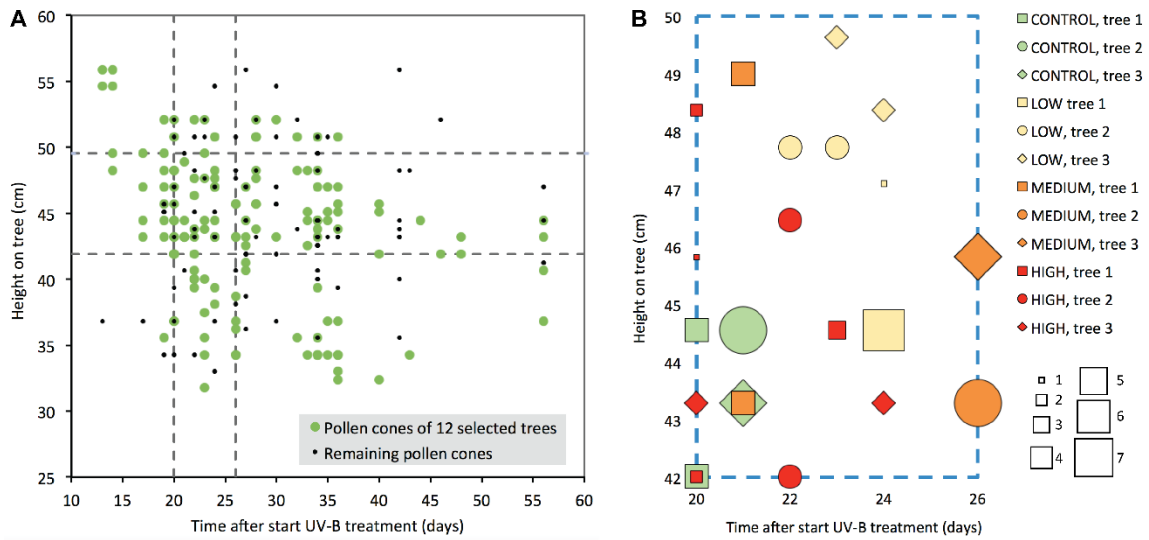

**fig. S2. Pollen cone subsampling strategy.** (A) Collection timing and canopy height of the 634 pollen cones that developed during the experimental period. Several cones were harvested on the same day and from the same height on the tree resulting in overlapping data points. (B) Collection timing and canopy height of the 96 pollen cones selected for further study. The symbol size refers to the number of cones of a particular tree harvested on the same day and canopy height.

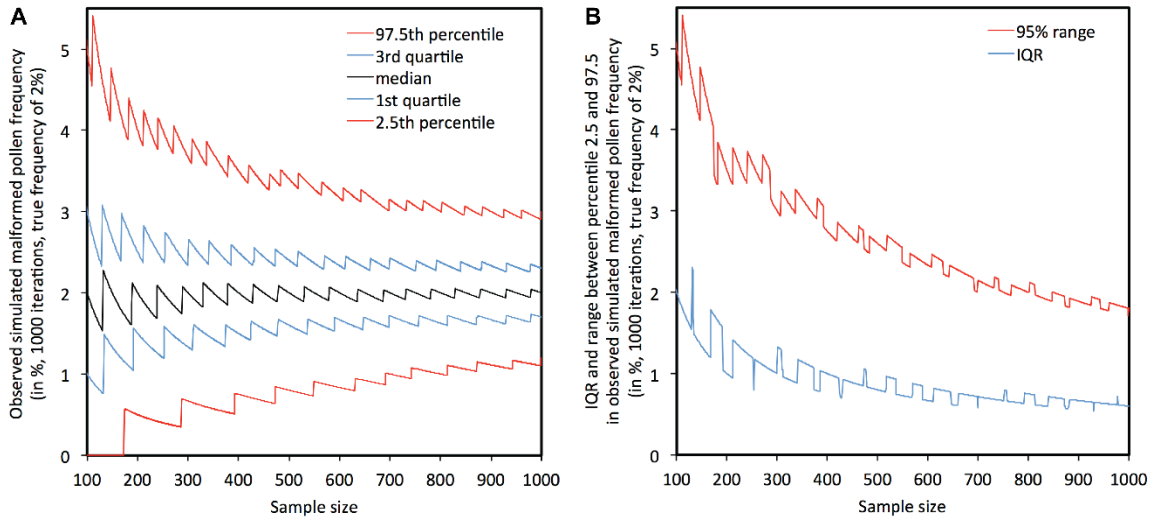

**fig. S3. Sample size and accuracy of malformed pollen frequency determination.**

During *in silico* simulations we simulated pollen subsamples of various sizes (100–1000 grains), in which each grain had 2% chance of being malformed. Each of the 901 different sample sizes was replicated 1000 times. **(A)** Frequency summary of observed malformation frequencies in simulated pollen subsamples. Various percentiles of observed simulated pollen malformation frequencies versus sample size are indicated. **(B)** Difference between the first and third quartile (interquartile range, or IQR) and between the 2.5<sup>th</sup> and 97.5<sup>th</sup> percentile (95% range) versus sample size.

**table S1. Results of a two-mixed-factor nested ANOVA of malformed pollen**

**frequencies.** Significance of treatment and tree-specific effects were tested. Listed are sum of squares (*SS*), degrees of freedom (*df*), mean sum of squares (*MS*), *F*-statistic (*F*), and *p*-value. Data consisted of 4 treatments, with 3 trees each, 8 cones per tree and 600 pollen grains per cone analyzed for malformations. In the analysis, treatment type was treated as a fixed factor; which tree within each treatment was treated as random factor.

|                                            | <i>SS</i> | <i>df</i> | <i>MS</i> | <i>F</i> | <i>p</i> -value |
|--------------------------------------------|-----------|-----------|-----------|----------|-----------------|
| Treatment (fixed factor)                   | 30979     | 3         | 10326     | 22.301   | 0.00031         |
| Tree; nested in treatments (random factor) | 3704      | 8         | 463.04    | 2.3617   | 0.02414         |
| Within                                     | 16469     | 84        | 196.06    |          |                 |
| Total                                      | 51152     | 95        | 538.45    |          |                 |

**table S2. Summary of a pairwise, two-mixed-factor nested ANOVA of malformed pollen frequencies.** The *F*-statistic is shown in the supra-diagonal part of both sub-tables; *p*-values in the sub-diagonal parts. Data consisted of 4 treatments, with 3 trees each, 8 cones per tree, and 600 pollen grains per cone analyzed for malformations. In the analysis, treatment type was treated as a fixed factor; which tree within each treatment was treated as random factor. Bold values refer to either significant differences between pairs of treatments, or significant differences between the trees within pairs of treatments. Numbers in the labels of enhanced UV-B treatments refer to the dosage of biologically effective UV-B at the top of the canopy, in (kJ m<sup>-2</sup>d<sup>-1</sup>)<sub>BE</sub>.

|           | Treatment (fixed factor) |               |               |               | Tree; nested in treatments (random factor) |               |              |              |
|-----------|--------------------------|---------------|---------------|---------------|--------------------------------------------|---------------|--------------|--------------|
|           | Control 0                | UV-B 54       | UV-B 75       | UV-B 93       | Control 0                                  | UV-B 54       | UV-B 75      | UV-B 93      |
| Control 0 |                          | 0.016         | <b>51.158</b> | <b>16.155</b> |                                            | <b>7.187</b>  | <b>2.602</b> | <b>2.829</b> |
| UV-B 54   | 0.9063                   |               | <b>81.503</b> | <b>19.922</b> | <b>0.0002</b>                              |               | 1.590        | <b>2.217</b> |
| UV-B 75   | <b>0.0020</b>            | <b>0.0008</b> |               | 1.619         | <b>0.0495</b>                              | 0.1947        |              | 2.011        |
| UV-B 93   | <b>0.0159</b>            | <b>0.0111</b> | 0.2722        |               | <b>0.0364</b>                              | <b>0.0835</b> | 0.1104       |              |



**table S3. Pollen malformation frequencies, percentages, and index per tree.**

Percentages rounded to the nearest tenth.

| Chamber treatment<br>(kJ m <sup>-2</sup> d <sup>-1</sup> ) <sub>BE</sub> | Tree | Pollen surveyed<br>(n) | Σ Malformation frequency | % Malformed | Malformation index* | Malformation classes |          |         |         |           |
|--------------------------------------------------------------------------|------|------------------------|--------------------------|-------------|---------------------|----------------------|----------|---------|---------|-----------|
|                                                                          |      |                        |                          |             |                     | 0 Sacci              | 1 Saccus | 3 Sacci | 4 Sacci | ≥ 5 Sacci |
| Control [0]                                                              | PM03 | 4800                   | 58                       | 1.2         | 0.8                 | 0                    | 0        | 49      | 7       | 2         |
| Control [0]                                                              | PM17 | 4800                   | 30                       | 0.6         | 0.4                 | 3                    | 0        | 22      | 5       | 0         |
| Control [0]                                                              | PM23 | 4800                   | 131                      | 2.7         | 1.8                 | 1                    | 0        | 116     | 12      | 2         |
| 54                                                                       | PM15 | 4800                   | 98                       | 2.0         | 1.3                 | 5                    | 0        | 90      | 2       | 1         |
| 54                                                                       | PM36 | 4800                   | 64                       | 1.3         | 0.9                 | 3                    | 0        | 58      | 3       | 0         |
| 54                                                                       | PM44 | 4800                   | 69                       | 1.4         | 0.9                 | 11                   | 0        | 50      | 4       | 4         |
| 75                                                                       | PM38 | 4800                   | 339                      | 7.1         | 4.6                 | 4                    | 0        | 328     | 5       | 2         |
| 75                                                                       | PM52 | 4800                   | 456                      | 9.5         | 6.3                 | 0                    | 0        | 438     | 16      | 2         |
| 75                                                                       | PM54 | 4800                   | 395                      | 8.2         | 5.4                 | 0                    | 1        | 371     | 22      | 1         |
| 93                                                                       | PM10 | 4800                   | 384                      | 8.0         | 5.3                 | 3                    | 0        | 371     | 10      | 0         |
| 93                                                                       | PM28 | 4800                   | 354                      | 7.4         | 4.9                 | 4                    | 0        | 334     | 14      | 2         |
| 93                                                                       | PM42 | 4800                   | 213                      | 4.4         | 2.9                 | 2                    | 0        | 205     | 6       | 0         |

**table S4. Ovulate cone survivorship across treatments.** Survivorship indicated by cones reaching stage 6. See (Fig. 4, A) for developmental stage descriptions, and (Fig. 4, B) for images of representative cones from each treatment. Percentages rounded to the nearest tenth.

| Stage reached       | Treatments (kJ m <sup>-2</sup> d <sup>-1</sup> ) <sub>BE</sub> |      |               |      |       |    |       |      |       |    |
|---------------------|----------------------------------------------------------------|------|---------------|------|-------|----|-------|------|-------|----|
|                     | Control [0]                                                    |      | Outdoor [7.2] |      | 54    |    | 75    |      | 93    |    |
|                     | Count                                                          | %    | Count         | %    | Count | %  | Count | %    | Count | %  |
| 1                   | -                                                              | -    | -             | -    | -     | -  | -     | -    | -     | -  |
| 2                   | -                                                              | -    | -             | -    | -     | -  | -     | -    | -     | -  |
| 3                   | -                                                              | -    | -             | -    | 12    | 25 | 37    | 77.1 | 14    | 28 |
| 4                   | -                                                              | -    | -             | -    | 36    | 75 | 11    | 22.9 | 36    | 72 |
| 4L                  | -                                                              | -    | -             | -    | -     | -  | -     | -    | -     | -  |
| 5E                  | -                                                              | -    | -             | -    | -     | -  | -     | -    | -     | -  |
| 5L                  | 1                                                              | 1.7  | 5             | 8.3  | -     | -  | -     | -    | -     | -  |
| 6                   | 59                                                             | 98.3 | 55            | 91.7 | -     | -  | -     | -    | -     | -  |
| Σ no. ovulate cones | 60                                                             |      | 60            |      | 48    |    | 48    |      | 50    |    |

**table S5. Temperature settings during growth chamber experiment.** Temperatures based on U.S. Climate Data for Berkeley, CA, US (79). Temperatures rounded to the nearest tenth.

| Interval, 2013 | Average high (°C)<br>T <sub>HIGH</sub> | Average low (°C)<br>T <sub>LOW</sub> | Mean (°C)<br>T <sub>AVE</sub> | Chamber day setting (°C)<br>T <sub>AVE</sub> | Chamber night setting (°C)<br>T <sub>LOW</sub> |
|----------------|----------------------------------------|--------------------------------------|-------------------------------|----------------------------------------------|------------------------------------------------|
| March–April    | 20.0                                   | 7.9                                  | 14.0                          | 14.0                                         | 8.0                                            |
| May            | 22.7                                   | 10.1                                 | 16.4                          | 16.0                                         | 10.0                                           |

**table S6. Photoperiod settings during growth chamber experiment.** Photoperiods based on estimations of sunrise and sunset times for Berkeley, CA, US (80). Values listed in hours : minutes. Chamber photoperiod rounded to the nearest half hour.

| Interval, 2013        | Estimated photoperiod<br>(first day of interval) | Estimated photoperiod<br>(last day of interval) | Averaged photoperiod | Chamber photoperiod |
|-----------------------|--------------------------------------------------|-------------------------------------------------|----------------------|---------------------|
| March/April<br>pooled | 11:23                                            | 13:45                                           | 12:37                | 12:30               |
| May                   | 13:47                                            | 14:36                                           | 14:12                | 14:00               |
